# Supplementary material
Source: PubMed Central journal article supplement (PMC3552070)
Supplement: NIHMS429668-supplement-01.pdf [file NIHMS429668-supplement-01.pdf]

### Alignment of Rat and Mouse GR Exons

**Key:** yellow = rat 1/mouse 2, bright green = rat 2/mouse 3, bright blue = rat 3/mouse 4, purple = rat 4/mouse 5, dark blue = rat 5/mouse 6, red = rat 6, mouse 7, dark green = rat 7/mouse 8, grey = rat 8/mouse 9

|       |     |                                                                 |     |
|-------|-----|-----------------------------------------------------------------|-----|
| Rat   | 1   | TTAATATTTGCCAATGGACTCCAAAGAATCCTTAGCTCCCCCTGGTAGAGACGAAGTCCC    | 60  |
| Mouse | 1   | TTAATATTTGCCAATGGACTCCAAAGAATCCTTAGCTCCCCCTGGTAGAGACGAAGTCCC    | 60  |
| Rat   | 61  | TGGCAGTTTGCTTGGCCAGGGGAGGGGAGCGTAATGGACTTTTATAAAAGCCTGAGGGG     | 120 |
| Mouse | 61  | CAGCAGTTTGCTTGGCCGGGGAGGGGAAGCGTGATGGACTTGTATAAAACCCTGAGGGG     | 120 |
| Rat   | 121 | AGGAGCTACAGTCAAGGTTTCTGCATCTTCGCCCTCAGTGGCTGCTGCTTCTCAGGCAGA    | 180 |
| Mouse | 121 | TGGAGCTACAGTCAAGGTTTCTGCGTCTTCACCCTCAGTGGCTGCTGCTTCTCAGGCAGA    | 180 |
| Rat   | 181 | TTCCAAGCAGCAGAGGATTCTCCTTGATTTCTCGAAAGGCTCCA-CAAGCAATGTgcagc    | 239 |
| Mouse | 181 | TTCCAAGCAGCAGAGGATTCTCCTTGATTTTTCAAAGGCT-CAGCAAGCAA--TGC-GC     | 236 |
| Rat   | 240 | agcgacagcagcagcagcagcagcagcagcagcagcagcagcagcagcagcagcagcagcagc | 299 |
| Mouse | 237 | A--G-CAGCAGCAGCAGCAGCAGCAGCAGCAGCAGCAGCAGCAGCAGCAGCAGCAGCCGCAGC | 293 |
| Rat   | 300 | CAGACTTATCCAAAGCCGTTTCACTGTCCATGGGGCTGTATATGGGAGAGACAGAAACAA    | 359 |
| Mouse | 294 | CAGATTTATCCAAAGCCGTTTCACTGTCCATGGGACTGTATATGGGAGAGACCGAAACAA    | 353 |
| Rat   | 360 | AAGTGATGGGGAATGACTTGGGCTACCCACAGCAGGGCCAACCTTGGCCTTCTCTCTGGGG   | 419 |
| Mouse | 354 | AAGTGATGGGGAATGACTTGGGCTACCCACAGCAGGGCCAGCTTGGCCTCTCTCTGGGG     | 413 |
| Rat   | 420 | AAACAGACTTTCGGCTTCTGGAAGAAAGCATTGCAAACCTCAATAGGTCGACCAG-CGTT    | 478 |
| Mouse | 414 | AAACAGACTTTCGGCTTCTGGAAGAAAGCATTGCAAACCTCAATAGGTCGACCAGCCG-T    | 472 |
| Rat   | 479 | CCAGAGAACCCCAAGAGTTCAACGTCTGCAACTGGGTGTGCTACCCCGACAGAGAAGGAG    | 538 |
| Mouse | 473 | CCAGAGAACCCCAAGAGTTCAACACCTGCAGCTGGGTGTGCTACCCCGACAGAGAAGGAG    | 532 |
| Rat   | 539 | TTTCCCAAACCTCACTCGGATGCATCTTCAGAACAGCAAAATCGAAAAAGCCAGACC-GG    | 597 |
| Mouse | 533 | TTTCCCAGACTCACTCTGATCCATCTTCAGAACAGCAAAATAGAAAAAGCCAG-CCTGG     | 591 |
| Rat   | 598 | CACCAACGGAGGCAGTGTGAAATTGTATCCACAGACCAAAGCACCTTTGACCTCTTGAA     | 657 |
| Mouse | 592 | CACCAACGGTGGCAGTGTGAAATTGTATACCACAGACCAAAGCACCTTTGACATCTTGCA    | 651 |
| Rat   | 658 | GGATTTGGAGTTTTCCGCTGGGTCCCCAGGTAAAGACACAAACGAGAGTCCCTGGAGATC    | 717 |
| Mouse | 652 | GGATTTGGAGTTTTCTGCCGGGTCCCCAGGTAAAGAGACAAACGAGAGTCCCTGGAGGTC    | 711 |
| Rat   | 718 | AGACCTGTTGATAGATGAAAACCTTGCTTTCTCCTTTGGCGGGAGAAGATGATCCATTCT    | 777 |
| Mouse | 712 | AGACCTGTTGATAGATGAAAACCTTGCTTTCTCCTTTGGCGGGAGAAGATGATCCATTCT    | 771 |



|       |      |                                                               |      |
|-------|------|---------------------------------------------------------------|------|
| Rat   | 1616 | AAAACAATAGTTCCTGCAGCATTACCACAGCTCACCCCTACCTTGGTGTCACTGCTGGAG  | 1675 |
| Mouse | 1610 | AAAACAATAGTTCCTGCCGCGCTGCCACAGCTTACCCCTACCTGGTGTCACTGCTGGAG   | 1669 |
| Rat   | 1676 | GTGATTGAACCCGAGGTGTTGTATGCAGGATATGATAGCTCTGTTCCAGATTCCAGCATGG | 1735 |
| Mouse | 1670 | GTGATCGAGCCTGAGGTGTTATATGCAGGATATGACAGCTCTGTTCCAGACTCAGCATGG  | 1729 |
| Rat   | 1736 | AGAATTATGACCACACTCAACATGTTAGGTGGGCGTCAAGTGATTGCAGCAGTGAAATGG  | 1795 |
| Mouse | 1730 | AGAATTATGACCACGCTCAACATGTTAGGTGGGCGCCAAGTGATTGCCGCAGTGAAATGG  | 1789 |
| Rat   | 1796 | GCAAAGGCGATACCAGGCTTCAGAACTTACACCTGGATGACCAAATGACCCTGCTACAG   | 1855 |
| Mouse | 1790 | GCAAAGGCGATACCAGGATTTCAGAACTTACACCTGGATGACCAAATGACCCTTCTACAG  | 1849 |
| Rat   | 1856 | TACTCATGGATGTTTCTCATGGCATTGTCCTGGGTTGGAGATCATAACAGACAATCAAGT  | 1915 |
| Mouse | 1850 | TACTCATGGATGTTTCTCATGGCATTGTCCTGGGTTGGAGATCATAACAGACAAGCAAGT  | 1909 |
| Rat   | 1916 | GGAAACCTGCTCTGCTTTGCTCCTGATCTGATTATTAATGAGCAGAGAATGTCTCTACCC  | 1975 |
| Mouse | 1910 | GGAAACCTGCTATGCTTTGCTCCTGATCTGATTATTAATGAGCAGAGAATGACTCTACCC  | 1969 |
| Rat   | 1976 | TGCATGTATGACCAATGTAAACACATGCTGTTTGTCTCCTCTGAATTACAAAGATTGCAG  | 2035 |
| Mouse | 1970 | TGCATGTATGACCAATGTAAACACATGCTGTTTATCTCCACTGAATTACAAAGATTGCAG  | 2029 |
| Rat   | 2036 | GTATCCTATGAAGAGTATCTCTGTATGAAAACCTTACTGCTTCTCTCCTCAGTTCCTAAG  | 2095 |
| Mouse | 2030 | GTATCCTATGAAGAGTATCTCTGTATGAAAACCTTACTGCTTCTCTCCTCAGTTCCTAAG  | 2089 |
| Rat   | 2096 | GAAGGTCTGAAGAGCCAAGAGTTATTTGATGAGATTTCGAATGACTTATATCAAAGAGCTA | 2155 |
| Mouse | 2090 | GAAGGTCTGAAGAGCCAAGAGTTATTTGATGAGATTTCGAATGACTTATATCAAAGAGCTA | 2149 |
| Rat   | 2156 | GGAAAAGCCATCGTCAAAGGGAAGGAACTCCAGTCAGAATGGCAACGGTTTTACCAA     | 2215 |
| Mouse | 2150 | GGAAAAGCCATTGTCAAAGGGAAGGAACTCCAGTCAGAATGGCAGCGGTTTTATCAA     | 2209 |
| Rat   | 2216 | CTGACAAAGCTTCTGGACTCCATGCATGAGGTGGTTGAGAATCTCCTTACCTACTGCTTC  | 2275 |
| Mouse | 2210 | CTGACAAAACTTTTGGACTCCATGCATGATGTGGTTGAAAATCTCCTTAGCTACTGCTTC  | 2269 |
| Rat   | 2276 | CAGACATTTTTGGATAAGACCATGAGTATTGAATCCCAGAGATGTTAGCTGAAATCATC   | 2335 |
| Mouse | 2270 | CAAACATTTTTGGATAAGTCCATGAGTATTGAATCCCAGAGATGTTAGCTGAAATCATC   | 2329 |
| Rat   | 2336 | ACTAATCAGATACCAAATATTCAAATGGAAATATCAAAAAGCTTCTGTTTCATCAAAAA   | 2395 |
| Mouse | 2330 | ACTAATCAGATACCAAATACTCAAATGGAAATATCAAAAAGCTTCTGTTTCATCAGAAA   | 2389 |
| Rat   | 2396 | TGACTGCCTTACTAAGAAAGGTTGCCTTAAAGAAAGTTGAATTTATAGCTTTTACTGTAC  | 2455 |
| Mouse | 2390 | TGACTGCCTTACTAAGAAAGGCTGCCTTAAAGAAAGTTGAATTTATAGCTTTTACTGTAC  | 2449 |
