# Supplementary material
Source: PubMed Central journal article supplement (PMC3552070)
Supplement: NIHMS429668-supplement-02.pdf [file NIHMS429668-supplement-02.pdf]

**Rat GR Exon Sequence and Predicted Amino Acid Sequence of GR $\beta$   
C-Terminal Region**

**A) Rat GR Intron 7 Sequence**

```
1   GTAAGTACCAGACATAAAGCCAGATCAACAGCGAAAAAGAAAACTCGGTTGTGGGCAGTG   60
61  CCACATGCCTTTAACCAGACACAGTAGAGCAGTGGGTGTCTGTGCGCTTGAGGCTAAGAT   120
121 AGTCTAGTCTGCCTTCAGAATGCCTGTCAGTCAGAGGTACTGAAAGAACCTCTCAAAGC   180
181 CCAAAGACAAAGAAAGAGGCAGAAACATGGGAATTTTGTAGGTCCTAAGGTTAGTTTTAA   240
241 TTAGTATATATAATGTATATAATTATATATACCAATCAGTCATCCCTTCCTCAGTTTATAT   300
301 ATTAGATTATTCAAGATAAATAATTTTGTACACATTCTCTTGTCTTATTAGTCTAGTCGT   360
361 TTGCATACAAATTCCTCTGTTAGTACAGAGTTTAATATTCCCTGCTGTACATGAATAAGC   420
421 TATCCAATTACACTGGTTTTCTCCTTCCTATATATCAGCACTCCTGTAGGCTGGCCTTTCA   480
481 CTCACAATCGCCCTTGATCCTGCTGCCTCAGTTTTCCCAAATGCTGGATCACAGGCATGCC   540
541 GGGCTTTCATTCTGCGTGCAGGTGAAGACATTTAAAAGCCTTTTGTCTTAGGTGCTTA   600
601 TTTTATTTAAATTATTTTTCTTATGAGGAATTC AACGAAGATTGGTATATTTTTATCAA   660
661 AATTTTATGAAGCCAATAAAGCATGAATACAGGATCTATAACAGGTCATCTGTGTATGT   720
721 ATTATGAGTTCAGTTTATAGTGTTTTTGTGGGATTCCTGAGTATGTGAACCAGTAGGTCC   780
781 CTGAATCTTGTTCTCTTCTTGGGTTCTTCTGTTTGTCTATCTTGTCCAACAATATAATG   840
841 GtttttattttattttgttatgtttcattttattattaCAATACTCTTAGAAGCTTTGAT   900
901 CTTTTTAATGAGAGAAGAGGTTAAGAGAAACTGGGAGGAGTTAGAAGGAGGGGATGCCAT   960
961 AATCGGGATATATCATATGAGAAAAGAATTTATTTCCAGTAAAAGAAAATAATATGTCAA   1020
1021 GACTTGGTGGGGAGCCAAGAGGTCCGCAGTTACGCCTTGAGCCCCACCGTCGCCTGTCTT   1080
1081 CTCTTG CAG 1089
```

**B) Predicted Translation:**

VSTRHKARSTAKKKTRLWAVPHAFNQ TQ Stop
