# Supplementary material
Source: PubMed Central journal article supplement (PMC3552070)
Supplement: NIHMS429668-supplement-04.pdf [file NIHMS429668-supplement-04.pdf]

**SUPPLEMENTAL TABLE 1: Comparison of Rat and Mouse GR Exons and Introns****A . Exons**

| <b>Mouse Exons</b> | <b>Size (nts)</b> | <b>Rat Exons</b> | <b>Size (nts)</b> | <b>Homology</b> |
|--------------------|-------------------|------------------|-------------------|-----------------|
| Exon 1             | 107               |                  |                   |                 |
| Exon 2             | 1248              | Exon 1           | 1254              | 95%             |
| Exon 3             | 164               | Exon 2           | 164               | 92%             |
| Exon 4             | 117               | Exon 3           | 117               | 95%             |
| Exon 5             | 276               | Exon 4           | 276               | 92%             |
| Exon 6             | 145               | Exon 5           | 145               | 98%             |
| Exon 7             | 131               | Exon 6           | 131               | 98%             |
| Exon 8             | 158               | Exon 7           | 158               | 96%             |
| Exon 9             | 4090              | Exon 8           | 4082              | 91%             |

**B. Introns**

| <b>Mouse Introns</b> | <b>Size (nts)</b> | <b>Rat Introns</b> | <b>Size (nts)</b> |
|----------------------|-------------------|--------------------|-------------------|
| Intron 1             | 3322              |                    |                   |
| Intron 2             | 57217             | Intron 1           | 64602             |
| Intron 3             | 4117              | Intron 2           | 4089              |
| Intron 4             | 1619              | Intron 3           | 2339              |
| Intron 5             | 936               | Intron 4           | 926               |
| Intron 6             | 700               | Intron 5           | 3393              |
| Intron 7             | 4722              | Intron 6           | 4880              |
| Intron 8             | 1061              | Intron 7           | 1089              |
