# Supplementary material
Source: PubMed Central journal article supplement (PMC3552070)
Supplement: NIHMS429668-supplement-05.pdf [file NIHMS429668-supplement-05.pdf]

### Comparison of Multiplexed measurements to GR common region measurements

| <b>Tissue</b>  | <b>Mean ratio</b> | <b>SD</b> |
|----------------|-------------------|-----------|
| Liver          | 1.2               | 0.2       |
| Spleen         | 1.3               | 0.1       |
| Thymus         | 0.9               | 0.1       |
| Lung           | 1.3               | 0.3       |
| Muscle         | 1.5               | 0.5       |
| Kidney         | 1.0               | 0.1       |
| Heart          | 1.2               | 0.1       |
| Adipose Tissue | 1.1               | 0.2       |
