# Supplementary material
Source: PubMed Central journal article supplement (PMC3552070)

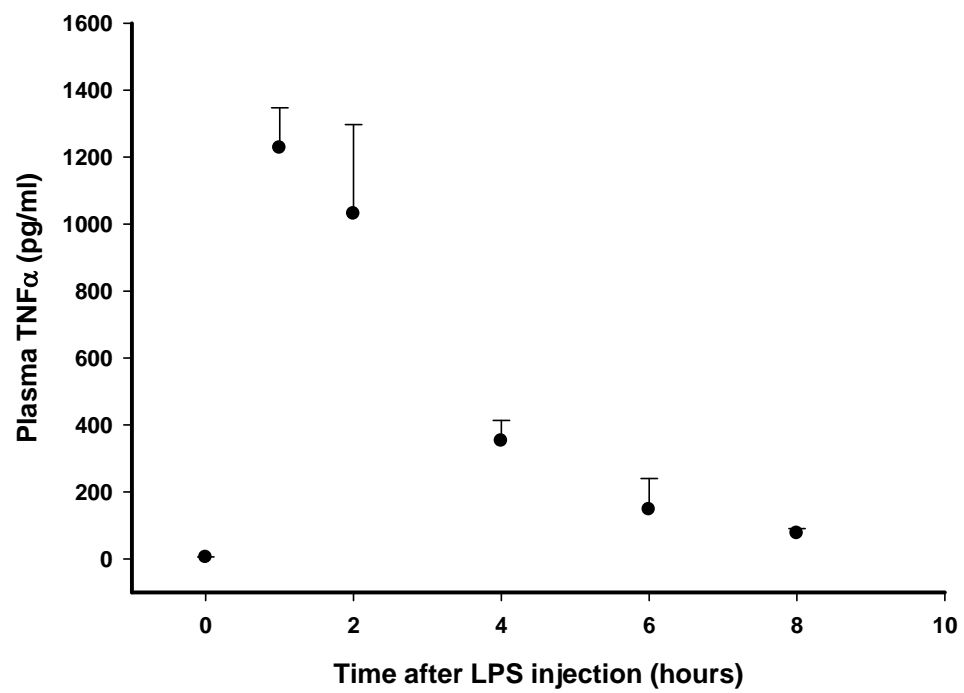

Supplement: NIHMS429668-supplement-03.pdf [file NIHMS429668-supplement-03.pdf]
